# Supplementary material
Source: Springer Nature journal article supplement (http://www.springermedizin.de/resource/supplementary/13063_2010_576_MOESM2_ESM.pdf/9618778)
Supplement: MOESM2 [file 9618778]

## **Interview script**

Good morning/afternoon. My name is ..... I would like to thank you for your assistance and your participation in this study. The meeting will be approximately two hour.

We are carrying out a study about the treatment in patients with COPD. In the first part of this meeting we attempt that you talk freely about this issue your experiences and point of view concerning COPD as start point. After this, we are going to identify everything that will be appearing as the conversation develops.

We request your permission to videotape the interview. This is for practical reason, so we can compile all the information from this meeting. We guarantee the confidentiality of all contents and they can only be used by the researchers.

You can talk whenever you wish, but, please, do not talk at the same time so that all the conversations can be heard clearly.

If you want, we can start by all saying our names, how long you have been a COPD patient and what do you think caused your COPD....

## **Interview basic topics**

- Do you take your medication as your doctor tells you? Do you take the doses/pill number prescribed?
- Do you feel confidence with your physician? Do you understand the things he says? Do you ask him what you do not understand?
- Do you think is a lifelong disease?
- Do you think your medication is useful? How do you think that it is beneficial to you? Do you think there is a better treatment?
- Do you have difficulty taking your inhaler? Do you feel that the inhaler is easy to use?
- Do you feel your medication works? Do you feel when the device is empty?
- Do you sometimes stop taking your inhaled medications? For example in summer or when you feel better or if you feel worse after you take your inhaler.
- Do you know the medical effect of the drug contained in the device or in the pill?
- Who is the responsible of your medication intake? Why?
- How do you feel when you need to take several medications at the same time? When this occurs is your life affected by this situation? Which one of the medication you take, do you think is essential or which one do you never leave out?
